# Supplementary material
Source: PubMed Central journal article supplement (PMC9239752)
Supplement: NIHMS1809952-supplement-SI.pdf [file NIHMS1809952-supplement-SI.pdf]

**Supplementary Information for**  
**Active Cytoskeletal Composites Display Emergent Tunable**  
**Contractility and Restructuring.**

Gloria Lee, Gregor Leech, Pancy Lwin, Jonathan Michel, Christopher Currie, Michael J. Rust,  
Jennifer L. Ross, Ryan J. McGorty, Moumita Das, and Rae M. Robertson-Anderson

\*Rae M. Robertson-Anderson

**Email:** [randerson@ucsd.edu](mailto:randerson@ucsd.edu)

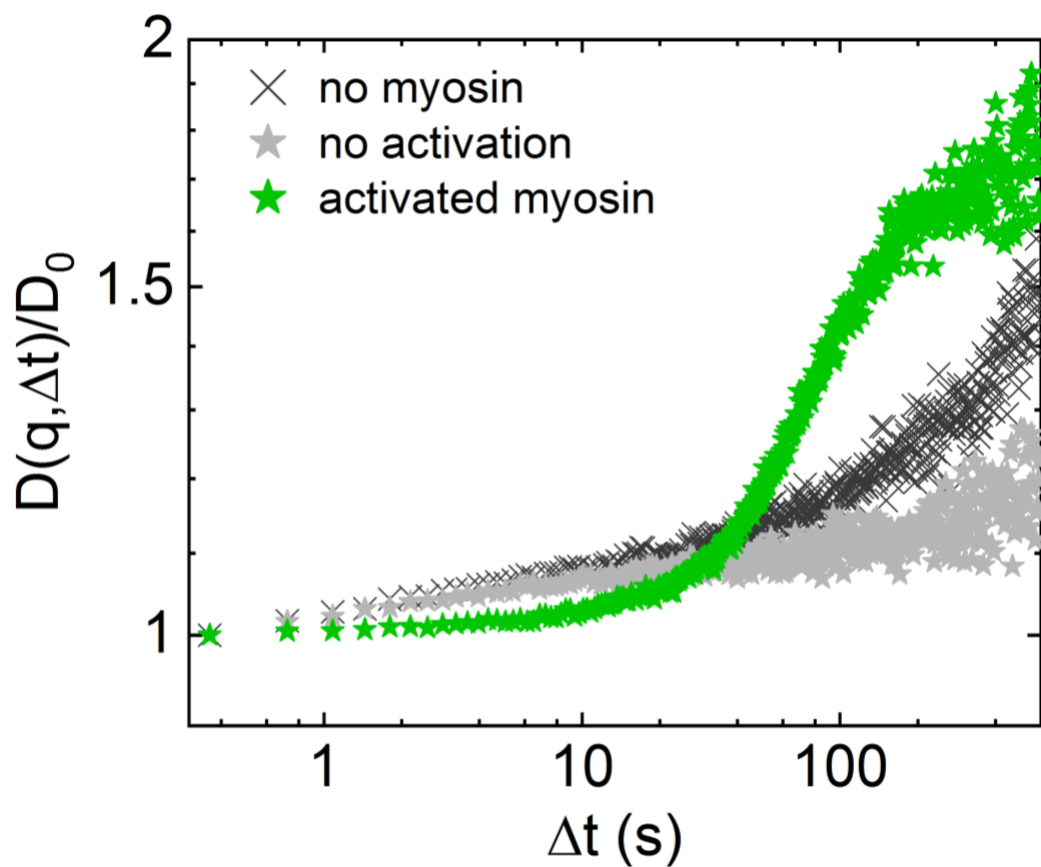

**Figure S1. Plateaus in DDM image structure functions are due to myosin-driven contractile dynamics.** Representative normalized image structure functions  $\frac{D(q, \Delta t)}{D_0}$  at  $q = 1.48 \mu\text{m}^{-1}$  in the actin channel for  $(\Phi_A, c_M) = (0.50, 0.24)$  composites imaged under the following conditions: no myosin is included in the composite (dark grey crosses), myosin is included but the composite is not exposed to 488 nm light to deactivate blebbistatin (light grey stars), and myosin is included and the composite is exposed to 488nm light (green stars). Neither negative control case (light or dark grey) reaches a decorrelation plateau over the experimental time frame, demonstrating that image structure function plateaus are due to myosin-driven active dynamics.

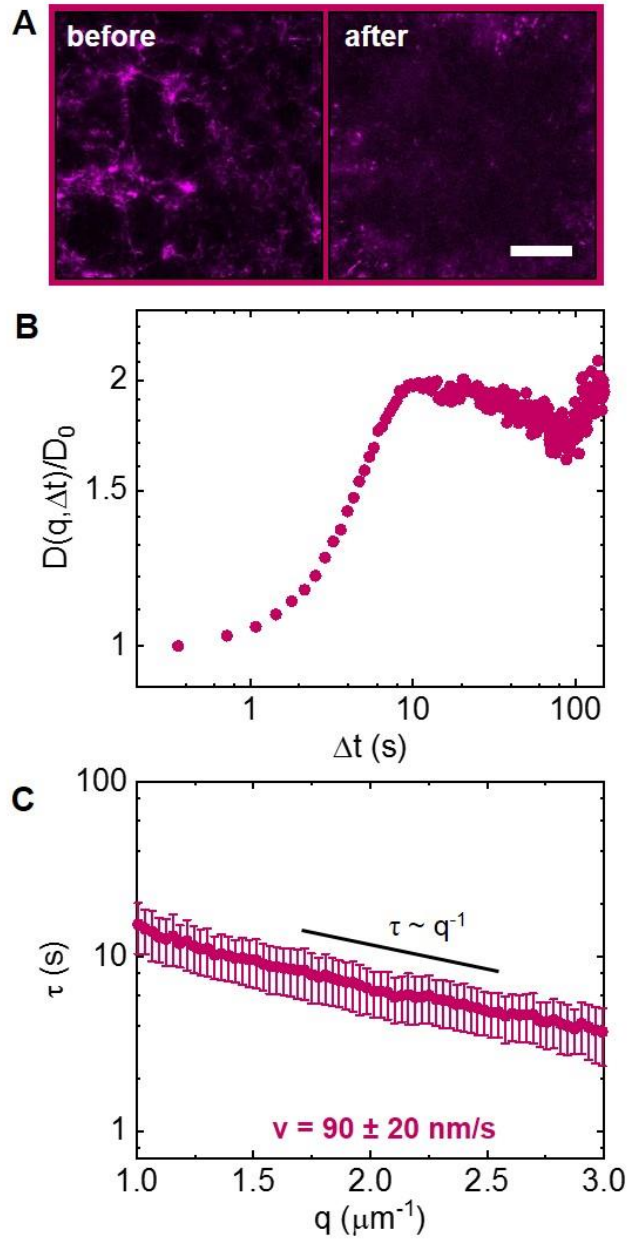

**Figure S2. Active entangled actin networks exhibit faster contraction dynamics than active actin-microtubule composites.** (A) Still images of a 5.8  $\mu\text{M}$  actin network ( $(\Phi_A, c_M) = (1, 0.24)$ ) before and after 6 min of myosin II rearrangement. Timescale is shortened due to the network disappearing from the field of view due to faster contraction dynamics. Scale bar is 50  $\mu\text{m}$ . (B) Representative normalized image structure function  $\frac{D(q, \Delta t)}{D_0}$  at  $q = 1.48 \mu\text{m}^{-1}$ .  $\frac{D(q, \Delta t)}{D_0}$  reaches a plateau at a much earlier lag time compared to networks containing microtubules (see Fig. 2A). (C) Average  $\tau(q)$  plot follows a power law relationship  $\tau = \frac{1}{kq}$ , from which we extract an average contraction velocity of  $90 \pm 20$  nm/s, faster than the velocity of the  $(\Phi_A, c_M) = (0.75, 0.48)$  composite. Error bars represent standard error across 5 replicates.

## Supplementary Information Text

### Double-Network Model and Calculations

**Mathematical model for simulating myosin-driven active double-networks composed of actin filaments and microtubules.** Rigidity percolation theory has been immensely successful in predicting the mechanical properties and phase transitions in single-component cytoskeletal and extracellular matrix networks as a function of filament concentrations. This theory models biopolymer networks as two interconnected networks of disordered fibers and provides a framework for connecting network rigidity to structure and composition. Here we combine rigidity percolation theory with an active double network model made of a stiff microtubule network and an active semiflexible actomyosin network.

This active rigidly percolating double-network (RPDN) is constructed as follows. Starting with two networks, each based on a fully occupied kagome lattice such that at each crosslink there are no more than two crossing fibers, we dilute the networks by uniformly and randomly removing bonds from the networks according to two different probabilities (Fig. S3). We remove bonds from the stiff microtubule network with probability  $1 - p_1$  and from the semiflexible actin network with probability  $1 - p_2$ , where  $0 < p_1, p_2 < 1$ , and a contiguous series of colinear bonds constitute a fiber. The stretching moduli of the fibers in the stiff and semiflexible networks are  $\alpha_1$  and  $\alpha_2$  respectively, and the bending moduli are  $\kappa_1$  and  $\kappa_2$  respectively. The two networks interact via weak Hookean springs with spring constant  $\alpha_3$ , which connect the midpoints of bonds  $(\mathbf{x}_1, \mathbf{x}_2)$  and are only present when corresponding bonds are present in both networks. The energy cost of deforming this double network is given by:

$$\begin{aligned} E_1 &= \frac{\alpha_1}{2} \sum_{\langle ij \rangle} p_{1,ij} (\mathbf{r}_{ij} - \mathbf{r}_{ij0})^2 + \frac{\kappa_1}{2} \sum_{\langle \widehat{ij} \widehat{k} = \pi \rangle} p_{1,ij} p_{1,jk} \Delta\theta_{ijk}^2 \\ E_2 &= \frac{\alpha_2}{2} \sum_{\langle ij \rangle} p_{2,ij} (\mathbf{s}_{ij} - \rho \mathbf{s}_{ij0})^2 + \frac{\kappa_2}{2} \sum_{\langle \widehat{ij} \widehat{k} = \pi \rangle} p_{2,ij} p_{2,jk} \Delta\beta_{ijk}^2 \\ E_3 &= \frac{\alpha_3}{2} \sum p_{1,ij} p_{2,ij} (\mathbf{x}_1 - \mathbf{x}_2)^2 \quad (1) \end{aligned}$$

where  $E_1$  is the deformation energy of the stiff network,  $E_2$  is the deformation energy of the semiflexible network, and  $E_3$  is the deformation energy of the bonds connecting the two networks. In  $E_1$  and  $E_2$ , the first term corresponds to the energy cost of fiber stretching, and the second term to fiber bending<sup>1</sup>.

In the above expression, the indices  $i, j, k$  refer to sites (nodes) in each lattice-based network, such that  $p_{ij}$  is 1 when a bond between those lattice sites is present and 0 if a bond is not present. The quantities  $\mathbf{r}_{ij}$  and  $\mathbf{s}_{ij}$  refer to the vector lengths between lattice sites  $i$  and  $j$  for the

deformed stiff and flexible networks respectively, while  $r_{ij0}$  and  $s_{ij0}$  are the corresponding quantities for the initial undeformed networks. Active contractility is incorporated into the semiflexible network by setting the rest length of the bonds in this network to be  $\rho s_{ij0}$ , where  $\rho$  is a function of myosin concentration as described later in this document and is 1 for a purely actin network and less than 1 for an actomyosin network<sup>2</sup>. The angles  $\Delta\theta_{ijk}$  in the rigid network and  $\Delta\beta_{ijk}$  in the semiflexible network correspond to the change in angles between initially collinear bond pairs  $ij$  and  $jk$  for the deformed and undeformed network, respectively.

Simulations of the above active RPDN model determined the linear response under 0.005% shear. We adopt a shear protocol where external deformations are applied along the top and bottom boundaries and periodic boundary conditions are used for the left and right sides of the network. For each set of parameters, active double networks containing  $\sim 2 \times 10^5$  nodes were randomly generated with given fractions of bonds  $1 - p_1$  and  $1 - p_2$  missing. The total deformation energy was minimized for the applied macroscopic shear and the shear modulus was calculated<sup>1</sup> as a function of the bond occupation probabilities  $p_1$  and  $p_2$ . The values of  $p_1$  and  $p_2$  were obtained from experimental molar concentrations of tubulin and actin respectively, and the contraction parameter  $\rho$  was obtained using the ratio of experimental myosin and actin concentrations as described in the next section.

We calculated the shear (elastic) modulus  $G'$  in simulation units using the expression  $G' = \frac{2\varepsilon}{\gamma^2}$ , where  $\varepsilon$  is the minimized energy per unit area of the simulation box and  $\gamma$  is the applied shear strain. One simulation unit of this elastic modulus corresponds to  $\sim 210$  kPa, as summarized in the next section. We use this conversion to obtain the values of  $G'$  presented in Figure 4. Since our simulations assume physical crosslinking in the microtubule and actin networks (absent in experiments), we believe that our simulations overestimate the true value of the modulus.

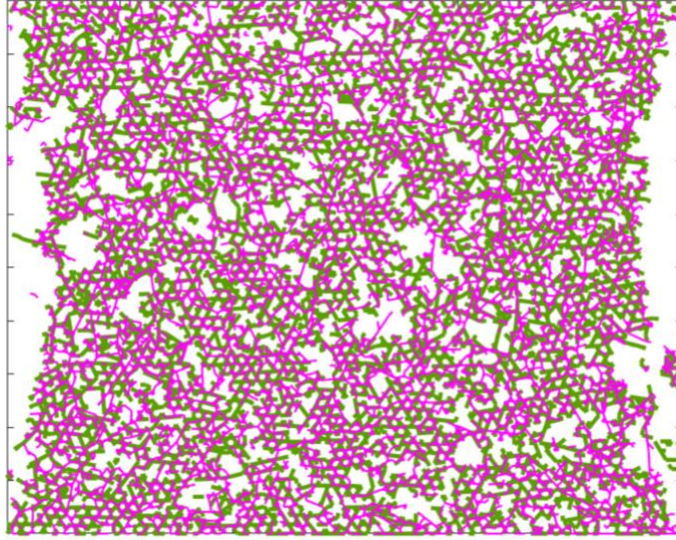

**Figure S3:** Model of an active double-network with molar actin fraction  $\Phi_A=0.5$ . Actin filaments are shown in magenta and microtubules are shown in green.

**Parameter estimation informed from experiments and literature.** To calculate stretching moduli and bending moduli, we use persistence lengths of 20  $\mu\text{m}$  and 1 mm, and diameters of 10 nm and 50 nm, for the actin filaments and microtubules respectively<sup>3</sup>.

By defining persistence length  $l_p$  as  $l_p = \frac{\kappa}{k_B T}$ , where  $\kappa$  is the bending stiffness of the bond,  $k_B$  is the Boltzmann constant and  $T$  is the temperature, the bending modulus is given by the relation  $\kappa \propto l_p$ . For slender rods, the stretching modulus is given by  $\alpha \propto \frac{l_p}{R^2}$ , where  $R$  is the cross-sectional radius of the rod<sup>4</sup>. From these two relationships, we can calculate the stretching moduli  $\alpha_1$  and  $\alpha_2$ , and the bending moduli  $\kappa_1$  and  $\kappa_2$ , of the fibers in the stiff and semiflexible networks respectively. In our simulations, all moduli are scaled by, and expressed in terms of,  $\alpha_1$ . To introduce contraction to the actomyosin network, we assign different values of  $\rho$ , or the amount the rest length of each bond is reduced due of myosin-induced contractility<sup>2</sup>, to networks with different myosin concentrations. We use the Fermi estimate  $\rho = 1 - \frac{[\text{myosin}]}{[\text{actin}]}$ , such that in the absence of myosin, the network does not undergo any contraction.

To map the concentrations of actin filaments and microtubules to the bond occupation probabilities in the semiflexible and rigid networks, we use the following procedure. Let each bond in the network have length  $l_0$ , and let a primitive cell of the network have a length  $a = l_0$ , as shown in Fig. S4.

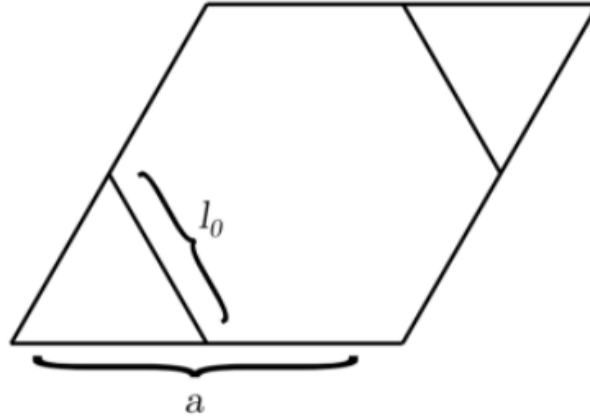

**Figure S4:** A single primitive cell of a kagome fiber network

There are eight perimeter bonds, each contributing half a bond to the primitive cell, and two interior bonds, each contributing one bond. The area of a primitive cell is  $A = \frac{\sqrt{3}a^2}{2} = 2\sqrt{3}l_0^2$ . For a bond occupation probability  $p$ , the length of fiber per unit area is then  $\frac{\text{length}}{\text{area}} = \frac{6pl_0}{2\sqrt{3}l_0^2} = \frac{p\sqrt{3}}{l_0}$ . Assuming the thickness of each slice of the three-dimensional sample to be  $l_0$ , the length per unit volume is then  $\frac{\text{length}}{\text{volume}} = \frac{p\sqrt{3}}{l_0^2}$ . For a given fiber type  $f$ , let  $n_f$  be the number of monomers per unit length. If the molar concentration is  $[f]$ , then the total fiber length per unit volume should be  $\frac{\text{length}}{\text{volume}} = \frac{[f]N_A}{n_f}$  where  $N_A$  is Avagadro's constant  $\approx 6.022 \times 10^{23}$ . By setting the two length per volume equations equal to each other,  $\frac{[f]N_A}{n_f} = \frac{p\sqrt{3}}{l_0^2}$ , we find  $p = \frac{l_0^2[f]N_A}{n_f\sqrt{3}}$ .

To determine  $n_f(\text{actin})$  and  $n_f(\text{microtubule})$ , which represent the number of monomers per unit length for actin filaments and microtubules, respectively, we use 2.7 nm per monomer for actin filaments<sup>5</sup> and 12 nm per 13 tubulin dimers for microtubules<sup>6</sup>. In using the above-mentioned calculation to map the microtubule and actin fractions to the bond occupation probabilities  $p_1$  and  $p_2$  respectively, we have set each bond occupation probability to 1 when the corresponding concentration is 5.8  $\mu\text{M}$ .

To determine  $G'$  in experimental units (i.e., Pa), we estimate the maximum attainable stiffness of a fiber network by considering an undiluted Kagome lattice, a primitive cell of which we show below. In this limit, the deformation is nearly affine, meaning a uniform strain is imposed throughout. A simple shear deformation induces a displacement in the  $x$  direction of  $y\varepsilon_s$ , where  $\varepsilon_s$

is the magnitude of the strain. Given that all bonds have an unstrained length  $l_0$ , the resulting strain energy is evaluated by finding the resultant change in the length of each bond, squaring this change in length, and multiplying by  $\frac{\alpha}{2}$ . Energies are truncated at quadratic order in the strain. The change in length of the bonds along the left and right edges of the primitive cell is

$$l - l_0 = \sqrt{\left(\frac{l_0}{2} + \frac{l_0\sqrt{3}}{2}\epsilon_s\right)^2 + \frac{3l_0^2}{4}} - l_0 \approx \frac{\sqrt{3}\epsilon_s l_0}{4} + \frac{3\epsilon_s^2 l_0}{8},$$

such that, to quadratic order in the strain, their energy of deformation is  $U_1 \approx \frac{3\alpha\epsilon_s^2 l_0^2}{32}$ .

The two interior bonds undergo a length change:  $l - l_0 \approx -\frac{\sqrt{3}\epsilon_s l_0}{4} + \frac{3\epsilon_s^2 l_0}{8}$ , such that their strain energy, to quadratic order, is the same as that of the bonds along the left and right edges of the primitive cell:  $U_2 \approx \frac{3\alpha\epsilon_s^2 l_0^2}{32}$ .

The bonds along the top and bottom of the primitive cell are not strained, as their vertices are at the same height, and the aforementioned displacement field therefore neither stretches nor compresses these bonds. The bonds along the left and right edges are shared between two primitive cells each, while the interior bonds are contained entirely within the primitive cell. Therefore, in computing the energy per primitive cell, the contribution from each bond along the left and right edges should be halved. The total energy per unit cell is  $2U_1 + 2U_2 = \frac{3\alpha\epsilon_s^2 l_0^2}{8}$ .

The area of the primitive cell is  $2\sqrt{3}l_0$ , so that the energy density is  $u = \frac{\sqrt{3}\alpha\epsilon_s^2}{16}$ , and the shear modulus is:  $G' = \frac{\partial^2 u}{\partial \epsilon_s^2} = \frac{\sqrt{3}\alpha}{8}$ . This modulus is appropriate for two-dimensional networks, but has the wrong dimensions for a three-dimensional shear modulus. To estimate a three-dimensional strain, we divide by the bond length to obtain  $G'_{3D} \approx \frac{\sqrt{3}\alpha}{8l_0}$ . For a micron-long microtubule, with Young's modulus  $Y$ , we compute the spring stiffness as  $\alpha = \frac{Y\pi r^2}{l_0} \approx .98 \frac{N}{m}$ , where we assume  $r \approx 12.5 \text{ nm}$  and  $Y \approx 2 \text{ GPa}$ . This suggests that one simulation unit of the 3D elastic modulus is equivalent to  $G'_{3D} \approx 2.1 \times 10^5 \text{ Pa}$ .

**Creating strain maps of actin and microtubule networks.** To produce strain maps, we begin by producing a Delaunay triangulation<sup>7</sup> of the vertices of the network in its undeformed state and compute the area of each triangular facet. After the bonds of the actin network are subjected to contractile forces, and the network is relaxed to its energetic ground state, we use the new positions



of the vertices in the microtubule and actin networks to produce deformed triangular meshes. We compute the new area of each deformed triangular mesh cell, subtract from this area the area of the corresponding, undeformed mesh cell, and divide by the area of the undeformed cell to find relative change in area. We next identify all groups of contiguous cells that undergo contraction, and all contiguous groups that undergo extension. To color-code contiguous regions that undergo contractile or extensile deformation, we take the fourth root of each relative extension and contraction to account for the large dynamic range in contraction and extension. We map these adjusted values to a color gradient in which deep red regions are highly contractile, and deep blue values are highly extensile.

**Table S1. Active composites exhibit ballistic contraction.**

| $(\Phi_A, \Phi_M)$ | power (microtubule channel) | power (actin channel) |
|--------------------|-----------------------------|-----------------------|
| (0.25, 0.12)       | --                          | --                    |
| (0.25, 0.24)       | --                          | --                    |
| (0.25, 0.48)       | $-0.97 \pm 0.01$            | $-0.88 \pm 0.08$      |
| (0.50, 0.12)       | --                          | --                    |
| (0.50, 0.24)       | $-1.00 \pm 0.08$            | $-1.1 \pm 0.1$        |
| (0.50, 0.48)       | $-0.94 \pm 0.05$            | $-0.87 \pm 0.04$      |
| (0.75, 0.12)       | $-1.5 \pm 0.2$              | $-1.5 \pm 0.1$        |
| (0.75, 0.24)       | $-1.12 \pm 0.07$            | $-1.10 \pm 0.07$      |
| (0.75, 0.48)       | $-1.1 \pm 0.1$              | $-1.03 \pm 0.07$      |

For image structure functions that plateau,  $\tau(q)$  plots are fit to the form  $\tau \sim q^b$  over the range  $q=1-3 \mu\text{m}^{-1}$ , where  $b$  is the power displayed in the table. Values are averaged over 3-5 replicates and error bars represent the corresponding standard error.

**Movie S1. Time-series of active actin-microtubule networks show varying compositions tune dynamics and structure.** [https://drive.google.com/file/d/1PIQFyRUjBFfkyA2vDHB\\_-k5fHO7ohtzW/view?usp=sharing](https://drive.google.com/file/d/1PIQFyRUjBFfkyA2vDHB_-k5fHO7ohtzW/view?usp=sharing)

## SI References

- [1] J. L. Silverberg, A. R. Barrett, M. Das, P. B. Petersen, L. J. Bonassar, and I. Cohen, *Biophysical journal* **107**, 1721 (2014).
- [2] C.P. Broedersz and F.C. MacKintosh, *Soft Matter*, **7**, 7 (2011).
- [3] S.N. Ricketts, J.L. Ross, R. M. Robertson-Anderson, *Biophysical journal* **115**, 6 (2018).
- [4] B. Lautrup. *Physics of continuous matter: exotic and everyday phenomena in the macroscopic world*. CRC press. (2011).
- [5] J. Hanson and J. Lowy, *Journal of molecular biology*, **6**, 1 (1963).
- [6] L. Farhadi, S.N. Ricketts, M.J. Rust, M. Das, R.M. Robertson-Anderson, and J.L. Ross, *Soft Matter*, **16**, 31 (2020).
- [7]. M. de Berg, O. Cheong, M. van Kreveld, and M. Overmars, *Computational Geometry, 3rd ed.*, Springer Verlag, Berlin (2008).
